# Supplementary material for: Effects of Age, Gender, BMI, and Anatomical Site on Skin Thickness in Children and Adults with Diabetes
Source: PubMed Central journal article supplement (PMC3897752; doi:10.1371/journal.pone.0086637), 2014-01-21

**Figure S1.** The association of age with thickness of skin layers in children (n=103) and adults (n=140). Data for females are in red and for males in blue.

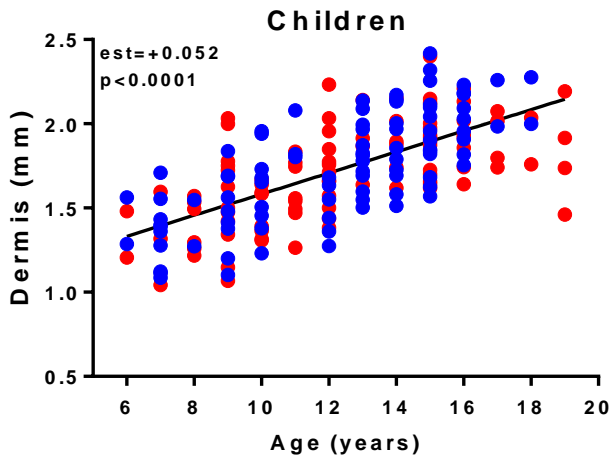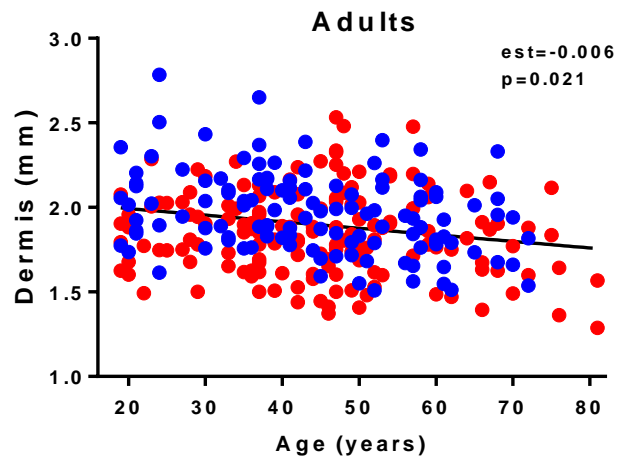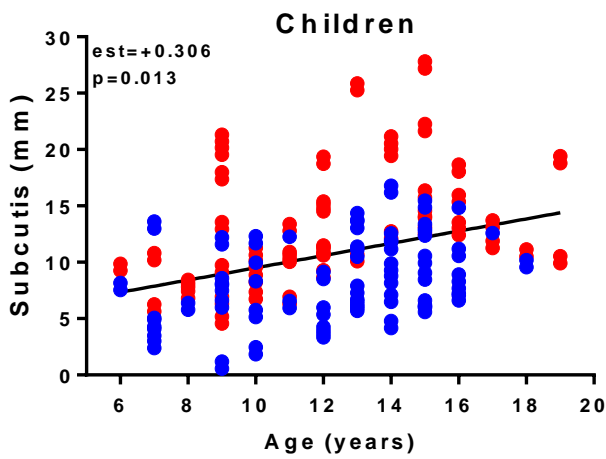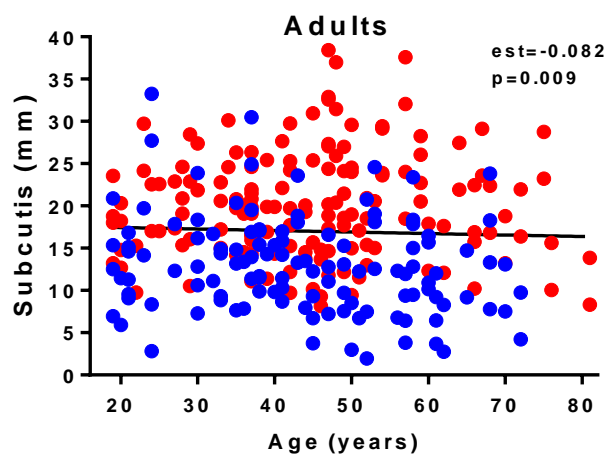

Supplement: pone.0086637.s001.pdf [file pone.0086637.s001.pdf]
